# Supplementary material
Source: publisher figshare collection journal article supplement (https://geolsoc.figshare.com/articles/dataset/_/3454460)
Supplement: Supplementary file 3 [file 1]

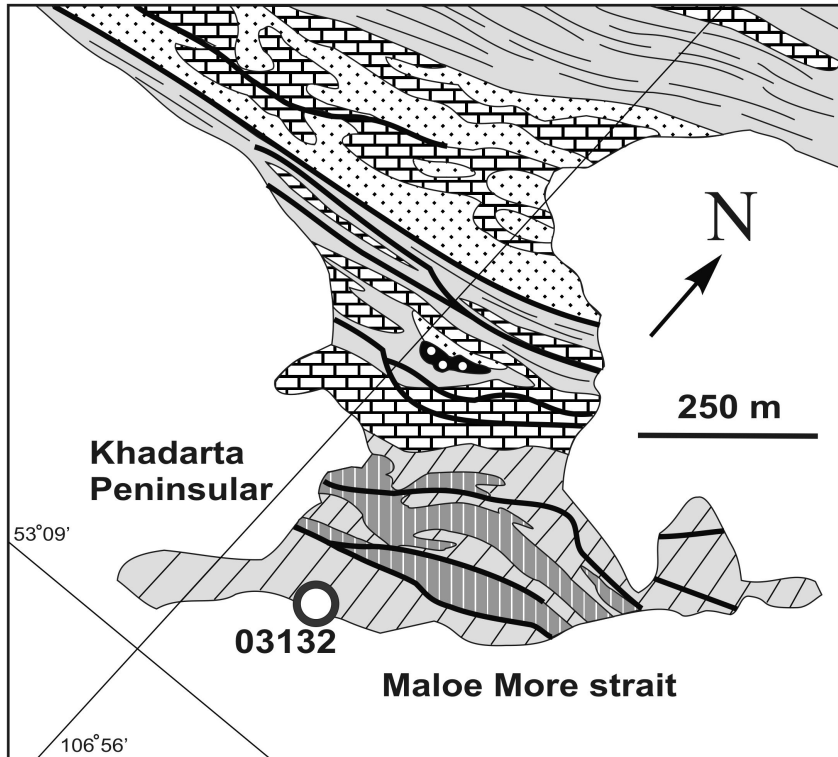

**Granulite facies**

 Granulite

 Marble

 Sample location

**Amphibolite facies**

 Gneiss and silicate-carbonate rocks

 Quartzite

 Marble and marble melange

 Granite

 Ol-pyroxenite
